# Supplementary material for: On the role of trans-lithospheric faults in the long-term seismotectonic segmentation of active margins: a case study in the Andes
Source: Copernicus journal article supplement (doi:10.5194/se-15-1319-2024), 2024-11-06
Supplement: Supplementary file 2 [file se-15-1319-2024-supplement.zip]

Table S1: Largest historical earthquakes in the Chilean convergent margin 1400 to present.

| YEAR | LAT South | LAT North | Length [km] | Magnitude [Mw] |
|------|-----------|-----------|-------------|----------------|
| 1430 | -23.5202  | -17.7696  | 680         | 9.0            |
| 1543 | -21.4374  | -17.7696  | 431         | 8.7            |
| 1575 | -34.3101  | -32.7746  | 204         | 8.0            |
| 1575 | -44.8873  | -37.5678  | 1081        | 9.2            |
| 1615 | -19.2597  | -18.0946  | 136         | 7.9            |
| 1647 | -35.2626  | -31.6197  | 484         | 8.0            |
| 1657 | -38.5345  | -36.5335  | 280         | 8.0            |
| 1730 | -35.1511  | -29.6821  | 718         | 8.5            |
| 1737 | -42.9733  | -38.8538  | 605         | 9.0            |
| 1751 | -40.2730  | -36.4787  | 537         | 8.5            |
| 1768 | -20.9279  | -17.7045  | 378         | 8.7            |
| 1796 | -30.3912  | -28.8484  | 197         | 7.7            |
| 1819 | -29.7414  | -26.1845  | 446         | 8.3            |
| 1822 | -34.8717  | -31.9098  | 393         | 8.0            |
| 1835 | -38.3208  | -34.3664  | 544         | 8.6            |
| 1837 | -41.8155  | -37.3512  | 643         | 8.9            |
| 1877 | -22.7035  | -17.5091  | 612         | 8.8            |
| 1880 | -31.6281  | -29.9707  | 214         | 8.2            |
| 1906 | -34.5352  | -31.7358  | 370         | 8.4            |
| 1922 | -30.3323  | -25.8162  | 567         | 8.6            |
| 1928 | -34.8717  | -33.4605  | 189         | 8.0            |
| 1943 | -31.3869  | -29.5040  | 242         | 7.9            |
| 1960 | -44.8873  | -37.7837  | 1051        | 9.3            |
| 1966 | -26.2423  | -24.9036  | 164         | 7.7            |
| 1967 | -22.1337  | -21.4505  | 81          | 7.4            |
| 1971 | -32.3184  | -31.2024  | 145         | 7.8            |
| 1985 | -33.1754  | -31.7358  | 189         | 7.8            |
| 1995 | -24.2695  | -22.4512  | 219         | 8.1            |
| 2007 | -22.3881  | -20.9917  | 166         | 7.7            |
| 2010 | -38.4811  | -34.0844  | 605         | 8.8            |
| 2014 | -20.8256  | -19.4935  | 157         | 8.2            |
| 2014 | -21.1323  | -20.3459  | 93          | 7.7            |
| 2015 | -31.6281  | -29.9707  | 214         | 8.3            |
| 2016 | -43.5923  | -42.9240  | 102         | 7.6            |
