# Supplementary material for: On the role of trans-lithospheric faults in the long-term seismotectonic segmentation of active margins: a case study in the Andes
Source: Copernicus journal article supplement (doi:10.5194/se-15-1319-2024), 2024-11-06
Supplement: Supplementary file 3 [file se-15-1319-2024-supplement.zip]

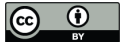

*Supplement of*

**On the role of trans-lithospheric faults in the long-term seismotectonic segmentation of active margins: a case study in the Andes**

**Gonzalo Yanez C. et al.**

*Correspondence to:* Gonzalo Yanez C. (gyaneza@uc.cl)

- se-15-1319-2024-supplement-title-page.pdf
- Table\_S1.pdf
- suppl\_material\_paper\_paper\_plate\_coupling\_solid\_earth\_final\_sep\_2024.pdf

The copyright of individual parts of the supplement might differ from the article licence.
